# Supplementary material for: Functional anatomy of zinc finger antiviral protein complexes
Source: Springer Nature journal article supplement (doi:10.1038/s41467-024-55192-z), 2024-12-30
Supplement: MOESM1 [file 41467_2024_55192_MOESM1_ESM.pdf]

## **Supplementary Information**

### **Functional anatomy of Zinc Finger Antiviral Protein complexes**

Jennifer A. Bohn, Jennifer L. Meagher, Matthew A. Takata, Daniel Gonçalves-Carneiro, Zoe C.

Yeoh, Melanie D. Ohi, Janet L. Smith, Paul D. Bieniasz

**Supplementary Figures 1 - 6**  
**Supplementary Tables 1, 2**

**a.** Flow cytometry workflow- Uninfected cells

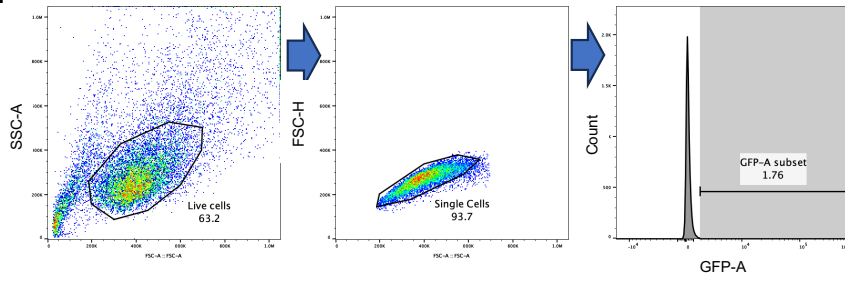

Flow cytometry workflow- Infected cells

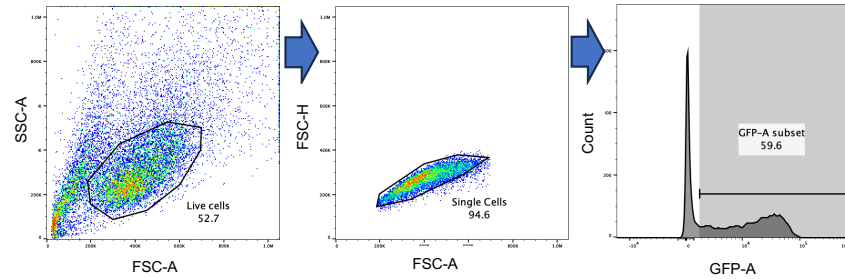

**b.**

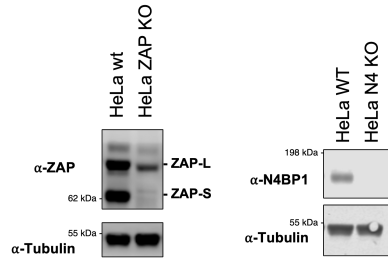

**c.**

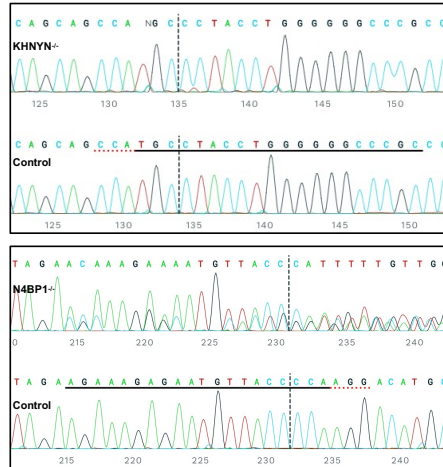

**d.**

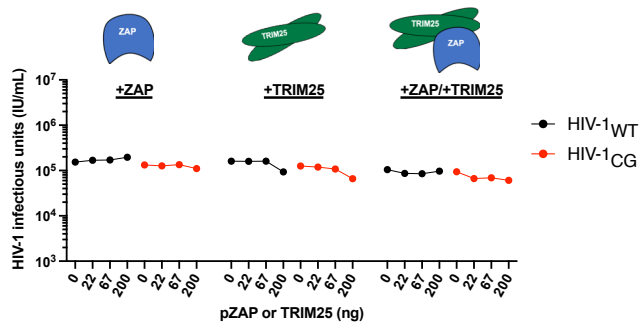

**Supplementary Figure 1. Knockout validation and KHNYN dependence of reconstitution assay**

- a.** Measurement of infectious virus yield by enumeration of infected (GFP-positive) cells using flow cytometry. Numbers indicate the percentage of cells falling within each gate FSC = forward scatter SSC= side scatter. This workflow is utilized for Figures: 1a-h, 1k-n, 2b-c, 3b-c, 5d-e, 6c, 6f-g, 7b, 7e and Supplementary Figures: 1c, 5b-c, 6a, 6f.
- b.** Western blot analysis of ZAP and N4BP1 expression in HeLa KO cell lines
- c.** Analysis of KHNYN and N4BP1 loci targeted by the respective sgRNA following CRISPR knockout.
- d.** Infectious virus yield in the 293T ZAP<sup>-/-</sup> TRIM25<sup>-/-</sup> KHNYN<sup>-/-</sup> N4BP1<sup>-/-</sup> reconstitution virus yield from cells transfected with plasmid expressing ZAP or TRIM25 alone or in combination (varying ng amounts of plasmid) in the absence of KHNYN or N4BP1 expression.

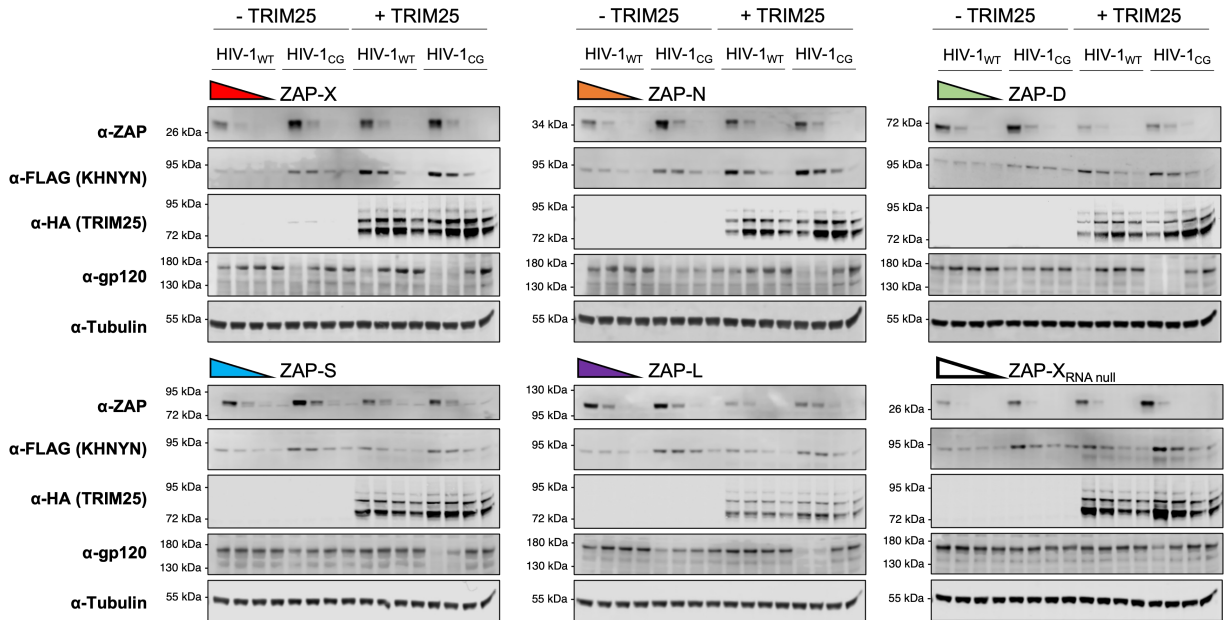

## Supplementary Figure 2. Protein expression in ZAP antiviral activity reconstitution assays

Lysates from 293T ZAP<sup>-/-</sup> TRIM25<sup>-/-</sup> KHNYN<sup>-/-</sup> N4BP1<sup>-/-</sup> cells, transfected as in the reconstitution assays in **Fig 2b,c**, analyzed by western blotting and probing with antibodies against ZAP (for all ZAP-3xHA constructs), KHNYN-FLAG, TRIM25-3xHA, HIV-1 gp120, and Tubulin.

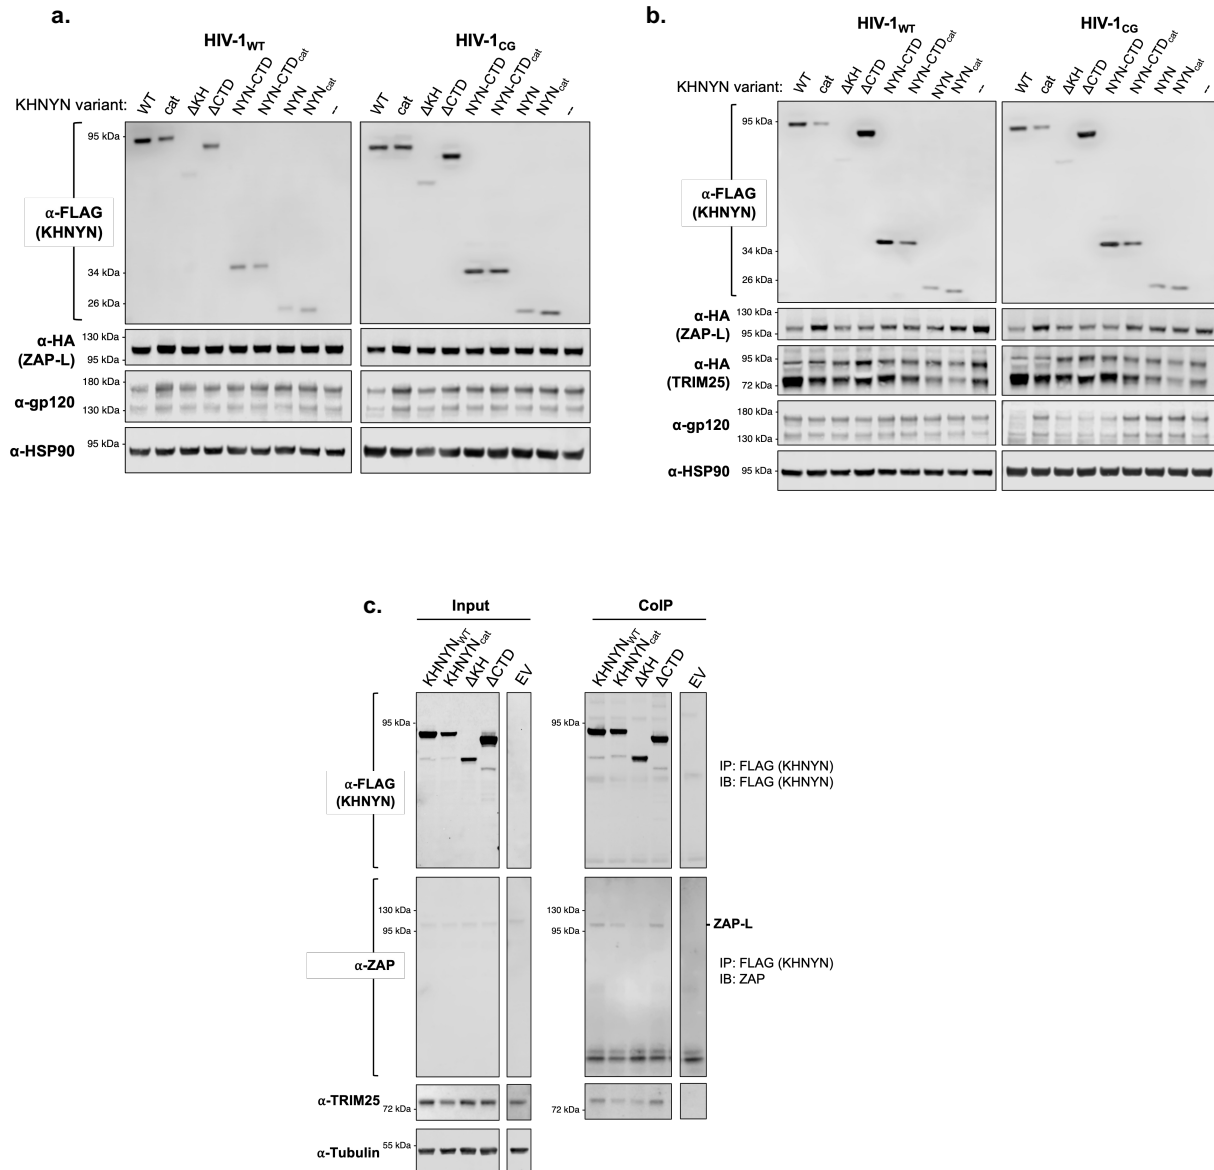

### Supplementary Figure 3. Protein expression from KHNYN reconstitution virus yield assays

**a, b.** Lysates from 293T ZAP<sup>-/-</sup> TRIM25<sup>-/-</sup> KHNYN<sup>-/-</sup> N4BP1<sup>-/-</sup> cells, transfected as in the reconstitution assays in Fig 3b (a) and Fig 3c (b), analyzed by western blotting and probing with antibodies against KHNYN-FLAG, ZAP-L-3xHA, TRIM25-3xHA, HIV-1 gp120, and HSP90.

**c.** Coimmunoprecipitation of endogenous TRIM25 and ZAP-L with KHNYN-FLAG following transfection of 293T KHNYN<sup>-/-</sup> N4BP1<sup>-/-</sup> cells with plasmids expressing the indicated KHNYN-FLAG constructs. Proteins were immunoprecipitated from cell lysates with an anti-FLAG antibody and subjected to western blot analyses.

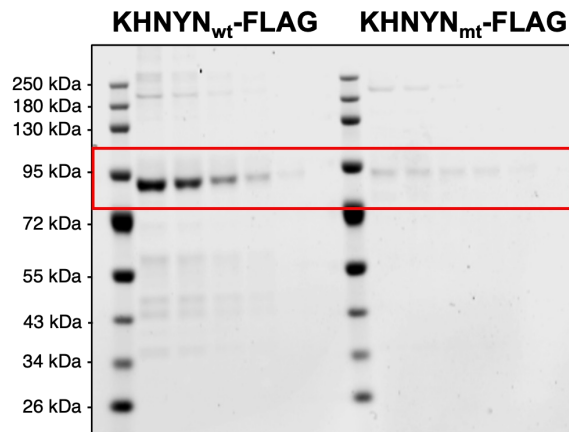

**Supplementary Figure 4. SDS-PAGE analysis of proteins used for nuclease assays.** Purified, recombinant KHNYN<sub>WT</sub>-FLAG and KHNYN<sub>cat</sub>-FLAG proteins visualized with Coomassie blue stain.

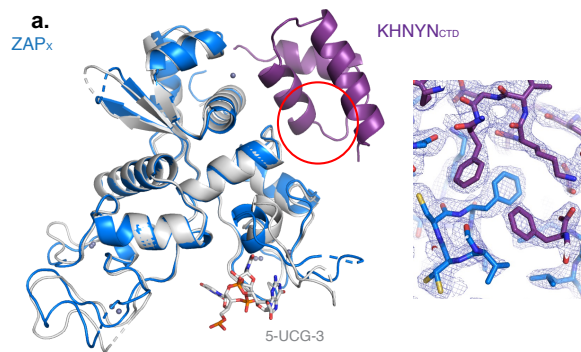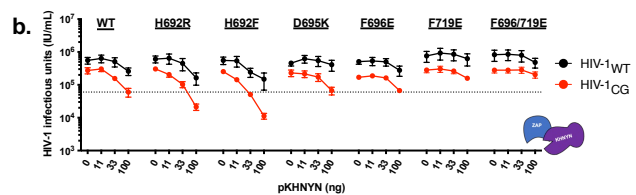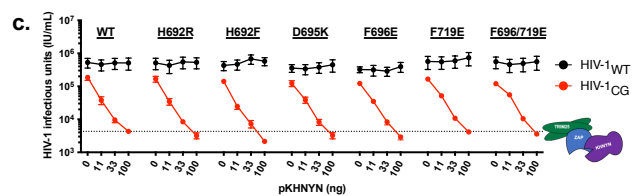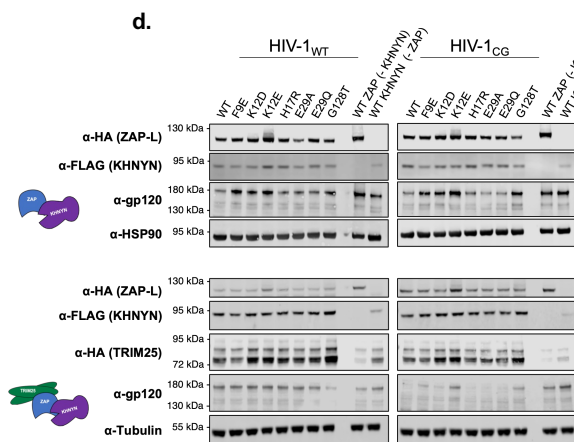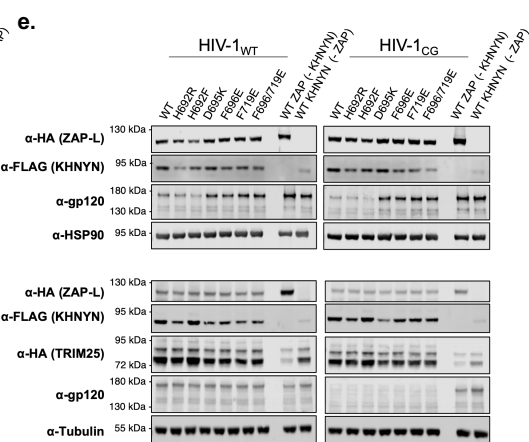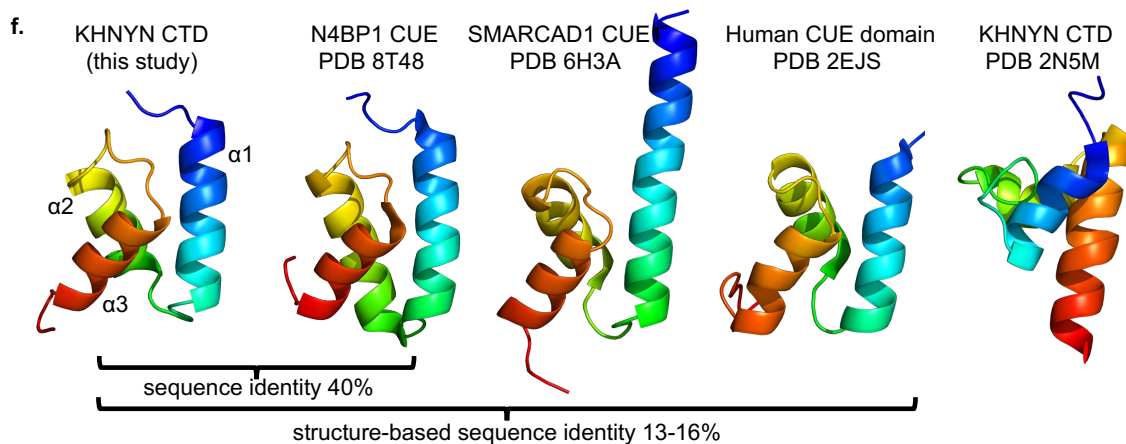

**Supplementary Figure 5. Structure-function analysis of ZAP-X–KHNYN<sub>CTD</sub> complex.**

**a.** Overlay of the ZAP-X–RNA complex structure (gray, PDB 6UEI) and the ZAP-X–KHNYN<sub>CTD</sub> complex (blue ZAP-X, purple KHNYN<sub>CTD</sub>). ZAP-X is virtually identical in the two structures (C $\alpha$ -atom RMSD 1.06 Å). To the right is an image of electron density for the hydrophobic region in the RBD-CTD interface (2Fo-Fc density contoured at 1.2 $\sigma$ ).

**b.** Reconstitution experiments in which increasing amounts of plasmids (ng) expressing WT and point mutant KHNYN proteins informed by the crystal structure were co-transfected with a constant amount (150 ng) of ZAP expression plasmid in 293T ZAP<sup>-/-</sup> TRIM25<sup>-/-</sup> KHNYN<sup>-/-</sup> N4BP1<sup>-/-</sup> cells. Effects on HIV-1<sub>WT</sub> and HIV-1<sub>CG</sub> virus yield was measured as infectious units (IU/ml). Error bars representative of three biological replicates.

**c.** Same as **b.** except that 75 ng TRIM25 expression plasmid was also transfected.

**d, e.** Lysates from 293T ZAP<sup>-/-</sup> TRIM25<sup>-/-</sup> KHNYN<sup>-/-</sup> N4BP1<sup>-/-</sup> cells, transfected as in Fig 5e,f. (**d**) or Fig S5b,c (**e**) were analyzed by western blotting probing with antibodies against KHNYN-FLAG, ZAP-L-3xHA, TRIM25-3xHA, HIV-1 gp120, and HSP90.

**f.** Comparison of KHNYN<sub>CTD</sub> structure determined in this study (9BGL) with homologs from the PDB (8T48, 6H3A, 2EJS) and with the previously published solution structure for KHNYN<sub>CTD</sub> (2N5M). The published CTD solution structure (2N5M, right) has a different topology and could not be superimposed on the other structures, which are shown in identical views.



### a. Residues involved in ubiquitin binding and ubiquitin ligase activity

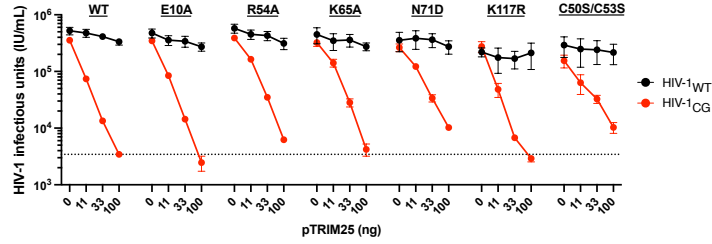

### b.

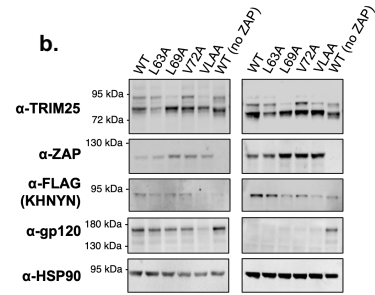

### c.

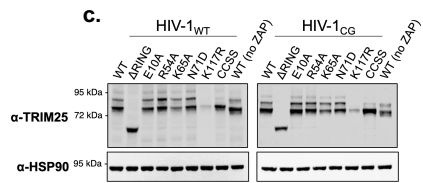

### d.

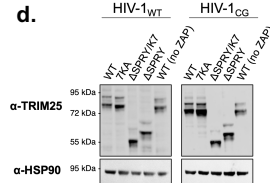

### e.

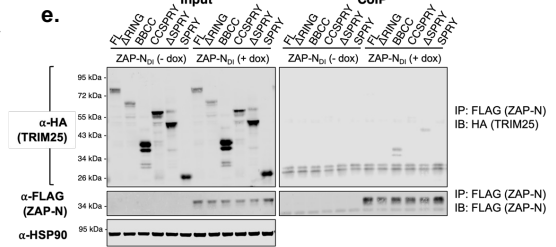

### f. Reconstitution with other full-length TRIM proteins

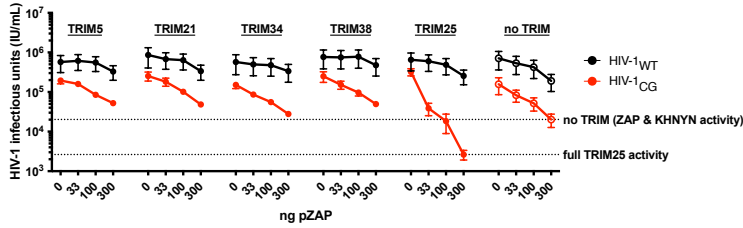

### g.

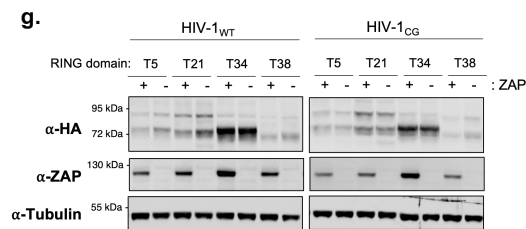

### h.

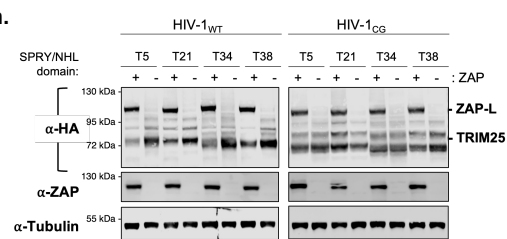

**Supplementary Figure 6. Additional molecular determinants of TRIM25 function.**

- a.** Reconstitution experiments in which increasing amounts of plasmids (ng) expressing WT and point mutant TRIM25 were co transfected with a constant amount of plasmids expressing KHNYN (75 ng) and ZAP-L (150 ng). WT = Wildtype. Antiviral effects were measured against HIV-1<sub>WT</sub> (black) and HIV-1<sub>CG</sub> (red). Wildtype TRIM25 was compared with a point mutants at residues involved in ubiquitin binding and ubiquitin ligase activity in the RING domain (E10A, R54A, K65A, N71D, K117R, CCSS). Effects on HIV-1<sub>WT</sub> (black) and HIV-1<sub>CG</sub> (red) virus yield was measured as infectious units (IU/ml). Error bars represent three biological replicates.
- b.** Lysates from 293T ZAP<sup>-/-</sup> TRIM25<sup>-/-</sup> KHNYN<sup>-/-</sup> N4BP1<sup>-/-</sup> cells, transfected as in **Fig 6b** were analyzed by western blotting probing with antibodies against KHNYN-FLAG, ZAP-L-3xHA, TRIM25-3xHA, HIV-1 gp120, and HSP90.
- c.** Lysates from 293T ZAP<sup>-/-</sup> TRIM25<sup>-/-</sup> KHNYN<sup>-/-</sup> N4BP1<sup>-/-</sup> cells, transfected as in **Fig S6a** were analyzed by western blotting probing with antibodies against TRIM25-3xHA and HSP90.
- d.** Lysates from 293T ZAP<sup>-/-</sup> TRIM25<sup>-/-</sup> KHNYN<sup>-/-</sup> N4BP1<sup>-/-</sup> cells, transfected as in **Fig 6c** were analyzed by western blotting probing with antibodies against TRIM25-3xHA and HSP90.
- e.** Coimmunoprecipitation of ZAP-N-FLAG and TRIM25 in 293T ZAP<sup>-/-</sup> TRIM25<sup>-/-</sup> KHNYN<sup>-/-</sup> N4BP1<sup>-/-</sup> cells transfected with plasmids expressing TRIM25 deletion mutants and stably expressing doxycycline inducible ZAP-N-FLAG (RNA binding domain only). Proteins were immunoprecipitated from cell lysates with anti-FLAG antibody and subjected to western blot analyses.
- f.** Reconstitution experiments in which increasing amounts of plasmids (ng) expressing the indicated full length TRIM proteins were co transfected with a constant amount of plasmids expressing KHNYN (75 ng) and ZAP-L (150 ng). Effects on HIV-1<sub>WT</sub> (black) and HIV-1<sub>CG</sub> (red) virus yield was measured as infectious units (IU/ml). Error bars represent three biological replicates.
- g.** Lysates from 293T ZAP<sup>-/-</sup> TRIM25<sup>-/-</sup> KHNYN<sup>-/-</sup> N4BP1<sup>-/-</sup> cells, transfected as in **Fig 6f** were analyzed by western blotting probing with antibodies against TRIM25-3xHA, ZAP-L and Tubulin.
- h.** Lysates from 293T ZAP<sup>-/-</sup> TRIM25<sup>-/-</sup> KHNYN<sup>-/-</sup> N4BP1<sup>-/-</sup> cells, transfected as in **Fig 6g** were analyzed by western blotting probing with antibodies against HA (TRIM25-3xHA, ZAP-3xHA) ZAP and Tubulin.

**Supplementary Table 1. Plasmid constructs used in this study**

| Vector | back gene      | variant                         | tag  | resistance | cloning method                | Notes                                                 |
|--------|----------------|---------------------------------|------|------------|-------------------------------|-------------------------------------------------------|
| pCR3.1 | ZAP            | aa 1-227 (X)                    | 3xHA | --         | cut pCR3.1, gibson insert in  | crystallization domain                                |
| pCR3.1 | ZAP            | aa 1-254 (N)                    | 3xHA | --         | cut pCR3.1, gibson insert in  | slightly larger N-terminus                            |
| pCR3.1 | ZAP            | aa 1-511 (D)                    | 3xHA | --         | cut pCR3.1, gibson insert in  | includes disordered domain following N-term ZnFs      |
| pCR3.1 | ZAP            | aa 1-699 (S)                    | 3xHA | --         | cut pCR3.1, gibson insert in  | naturally occurring isoform, ZAP-S                    |
| pCR3.1 | ZAP            | aa 1-902 (L)                    | 3xHA | --         | cut pCR3.1, gibson insert in  | full length, ZAP-L                                    |
| pCR3.1 | ZAP            | aa 1-227 (X), RNA-null          | 3xHA | --         | cut pCR3.1, gibson insert in  | aa 74-76 RRK>AAA, eliminates RNA binding              |
| pCR3.1 | ZAP            | aa 1-902 (L), RNA-null          | 3xHA | --         | cut pCR3.1, gibson insert in  | aa 74-76 RRK>AAA, eliminates RNA binding              |
| pCR3.1 | ZAP            | aa 255-902, deleted RNA binding | 3xHA | --         | cut pCR3.1, gibson insert in  | ZAP-L with RNA binding domain deleted entirely        |
| LKO    | ZAP            | aa 1-254 (N)                    | 3xHA | puro       | cut LKO, gibson insert in     |                                                       |
| LKO    | ZAP            | aa 1-902 (L)                    | 3xHA | puro       | cut LKO, gibson insert in     |                                                       |
| LKO    | ZAP            | aa 1-254 (N)                    | Flag | puro       | cut LKO, gibson insert in     |                                                       |
| LKO    | ZAP            | aa 1-902 (L)                    | Flag | puro       | cut LKO, gibson insert in     |                                                       |
| pCR3.1 | ZAP            | ZAP-L, F9E                      | 3xHA | --         | site directed mutagenesis     | mutants for testing of ZAP-N/KHNYN CTD xtal struc     |
| pCR3.1 | ZAP            | ZAP-L, K12D                     | 3xHA | --         | site directed mutagenesis     | mutants for testing of ZAP-N/KHNYN CTD xtal struc     |
| pCR3.1 | ZAP            | ZAP-L, K12E                     | 3xHA | --         | site directed mutagenesis     | mutants for testing of ZAP-N/KHNYN CTD xtal struc     |
| pCR3.1 | ZAP            | ZAP-L, H17R                     | 3xHA | --         | site directed mutagenesis     | mutants for testing of ZAP-N/KHNYN CTD xtal struc     |
| pCR3.1 | ZAP            | ZAP-L, E29A                     | 3xHA | --         | site directed mutagenesis     | mutants for testing of ZAP-N/KHNYN CTD xtal struc     |
| pCR3.1 | ZAP            | ZAP-L, E29Q                     | 3xHA | --         | site directed mutagenesis     | mutants for testing of ZAP-N/KHNYN CTD xtal struc     |
| pCR3.1 | ZAP            | ZAP-L, G128T                    | 3xHA | --         | site directed mutagenesis     | mutants for testing of ZAP-N/KHNYN CTD xtal struc     |
| LKO    | KHNYN          | full length- KHNYN-2 WT         | Flag | puro       | from Matt                     | wildtype KHNYN-2                                      |
| pCR3.1 | KHNYN          | full length- KHNYN-2 WT         | Flag | --         | cut pCR3.1, gibson insert in  | wildtype KHNYN-2                                      |
| pCR3.1 | KHNYN          | full length- KHNYN-2 DDAA       | Flag | --         | site directed mutagenesis     | catalytic mutant D565,D566A (DDAA)                    |
| pCR3.1 | KHNYN          | deleted KH                      | Flag | --         | cut pCR3.1, gibson insert in  | deleted KH domain (aa 12-197 deleted)                 |
| pCR3.1 | KHNYN          | deleted CTD                     | Flag | --         | cut pCR3.1, gibson insert in  | deleted CTD domain (aa 667-719 deleted)               |
| pCR3.1 | KHNYN          | KH domain alone                 | Flag | --         | cut pCR3.1, gibson insert in  | KH domain alone (aa 12-197)                           |
| pCR3.1 | KHNYN          | NYN-CTD (NC) WT                 | Flag | --         | cut pCR3.1, gibson insert in  | aa 451-719, WT                                        |
| pCR3.1 | KHNYN          | NYN-CTD DDAA                    | Flag | --         | cut pCR3.1, gibson insert in  | aa 451-719, DDAA catalytic mt                         |
| pCR3.1 | KHNYN          | NYN                             | Flag | --         | cut pCR3.1, gibson insert in  | aa 451-634, wt                                        |
| pCR3.1 | KHNYN          | NYN DDAA                        | Flag | --         | cut pCR3.1, gibson insert in  | aa 451-634, DDAA catalytic mt                         |
| pCR3.1 | KHNYN          | Y497A                           | Flag | --         | site directed mutagenesis     | mutation of possible phosphorylation site             |
| pCR3.1 | KHNYN          | K656A                           | Flag | --         | site directed mutagenesis     | mutation of possible ubiquitylation site              |
| pCR3.1 | KHNYN          | H692F                           | Flag | --         | site directed mutagenesis     | mutants for testing of ZAP-N/KHNYN CTD xtal struc     |
| pCR3.1 | KHNYN          | H692R                           | Flag | --         | site directed mutagenesis     | mutants for testing of ZAP-N/KHNYN CTD xtal struc     |
| pCR3.1 | KHNYN          | D695K                           | Flag | --         | site directed mutagenesis     | mutants for testing of ZAP-N/KHNYN CTD xtal struc     |
| pCR3.1 | KHNYN          | F696E                           | Flag | --         | site directed mutagenesis     | mutants for testing of ZAP-N/KHNYN CTD xtal struc     |
| pCR3.1 | KHNYN          | F719E                           | Flag | --         | site directed mutagenesis     | mutants for testing of ZAP-N/KHNYN CTD xtal struc     |
| pCR3.1 | KHNYN          | F696, 719E                      | Flag | --         | site directed mutagenesis     | mutants for testing of ZAP-N/KHNYN CTD xtal struc     |
| pCR3.1 | KHNYN          | aa 1-718                        | Flag | --         | cut pCR3.1, gibson insert in  | mutants for testing of ZAP-N/KHNYN CTD xtal struc     |
| pCR3.1 | TRIM25         | WT                              | 3xHA | --         | cut pCR3.1, gibson insert in  | aa 1-630                                              |
| pCR3.1 | TRIM25         | deleted RING_1                  | 3xHA | --         | cut pCR3.1, gibson insert in  | aa 83-630, deleted RING domain                        |
| pCR3.1 | TRIM25         | deleted RING_2                  | 3xHA | --         | cut pCR3.1, gibson insert in  | aa 102-630, deleted RING (and space between RING      |
| pCR3.1 | TRIM25         | RING                            | 3xHA | --         | cut pCR3.1, gibson insert in  | aa 1-82, RING domain alone                            |
| pCR3.1 | TRIM25         | RBB                             | 3xHA | --         | cut pCR3.1, gibson insert in  | aa 1-189, RING and Bbox domains                       |
| pCR3.1 | TRIM25         | BBCC_1                          | 3xHA | --         | cut pCR3.1, gibson insert in  | aa 83-379, Bbox and Coiled coil (with space between   |
| pCR3.1 | TRIM25         | BBCC_2                          | 3xHA | --         | cut pCR3.1, gibson insert in  | aa 102-379, Bbox and Coiled coil                      |
| pCR3.1 | TRIM25         | CC                              | 3xHA | --         | cut pCR3.1, gibson insert in  | aa 189-379, Coiled coil                               |
| pCR3.1 | TRIM25         | CCSPRY                          | 3xHA | --         | cut pCR3.1, gibson insert in  | aa 189-630, Coiled coil and SPRY                      |
| pCR3.1 | TRIM25         | SPRY                            | 3xHA | --         | cut pCR3.1, gibson insert in  | aa 434-630, SPRY domain alone                         |
| pCR3.1 | TRIM25         | deleted 7K and SPRY             | 3xHA | --         | cut pCR3.1, gibson insert in  | aa 1-379, deleted 7 lysines and SPRY domain           |
| pCR3.1 | TRIM25         | deleted SPRY                    | 3xHA | --         | cut pCR3.1, gibson insert in  | aa 1-410, deleted SPRY domain                         |
| pCR3.1 | TRIM25         | 7KA                             | 3xHA | --         | from Matt                     | 7 lysines mutated to alanine (aa 381,382, 385, 388, 3 |
| pCR3.1 | TRIM25         | E10A                            | 3xHA | --         | site directed mutagenesis     | mutatnts in RING domain to test TRIM25 function       |
| pCR3.1 | TRIM25         | R54A                            | 3xHA | --         | site directed mutagenesis     | mutatnts in RING domain to test TRIM25 function       |
| pCR3.1 | TRIM25         | L63A                            | 3xHA | --         | site directed mutagenesis     | mutatnts in RING domain to test TRIM25 function       |
| pCR3.1 | TRIM25         | K65A                            | 3xHA | --         | site directed mutagenesis     | mutatnts in RING domain to test TRIM25 function       |
| pCR3.1 | TRIM25         | L69A                            | 3xHA | --         | site directed mutagenesis     | mutatnts in RING domain to test TRIM25 function       |
| pCR3.1 | TRIM25         | N71D                            | 3xHA | --         | site directed mutagenesis     | mutatnts in RING domain to test TRIM25 function       |
| pCR3.1 | TRIM25         | V72A                            | 3xHA | --         | site directed mutagenesis     | mutatnts in RING domain to test TRIM25 function       |
| pCR3.1 | TRIM25         | V68, L69A                       | 3xHA | --         | site directed mutagenesis     | mutatnts in RING domain to test TRIM25 function       |
| pCR3.1 | TRIM5          | full length TRIM5               | 3xHA | --         | cut pCR3.1, gibson insert in  | test various TRIMs in reconstitution assay            |
| pCR3.1 | TRIM21         | full length TRIM21              | 3xHA | --         | cut pCR3.1, gibson insert in  | test various TRIMs in reconstitution assay            |
| pCR3.1 | TRIM34         | full length TRIM34              | 3xHA | --         | cut pCR3.1, gibson insert in  | test various TRIMs in reconstitution assay            |
| pCR3.1 | TRIM38         | full length TRIM38              | 3xHA | --         | cut pCR3.1, gibson insert in  | test various TRIMs in reconstitution assay            |
| pCR3.1 | TRIM25 chimera | TRIM25 w/ TRIM5 RING            | 3xHA | --         | cut pCR3.1, gibson insert in  | TRIM25 chimera with various RING domains              |
| pCR3.1 | TRIM25 chimera | TRIM25 w/ TRIM21 RING           | 3xHA | --         | cut pCR3.1, gibson insert in  | TRIM25 chimera with various RING domains              |
| pCR3.1 | TRIM25 chimera | TRIM25 w/ TRIM34 RING           | 3xHA | --         | cut pCR3.1, gibson insert in  | TRIM25 chimera with various RING domains              |
| pCR3.1 | TRIM25 chimera | TRIM25 w/ TRIM38 RING           | 3xHA | --         | cut pCR3.1, gibson insert in  | TRIM25 chimera with various RING domains              |
| pCR3.1 | TRIM25 chimera | TRIM25 w/ TRIM5 SPRY            | 3xHA | --         | cut pCR3.1, gibson insert in  | TRIM25 chimera with various SPRY domains              |
| pCR3.1 | TRIM25 chimera | TRIM25 w/ TRIM21 SPRY           | 3xHA | --         | cut pCR3.1, gibson insert in  | TRIM25 chimera with various SPRY domains              |
| pCR3.1 | TRIM25 chimera | TRIM25 w/ TRIM34 SPRY           | 3xHA | --         | cut pCR3.1, gibson insert in  | TRIM25 chimera with various SPRY domains              |
| pCR3.1 | TRIM25 chimera | TRIM25 w/ TRIM38 SPRY           | 3xHA | --         | cut pCR3.1, gibson insert in  | TRIM25 chimera with various SPRY domains              |
| pCR3.1 | TRIM25 chimera | TRIM25 w/ ZAP-N as SPRY, cl     | 3xHA | --         | cut pCR3.1, gibson insert in  | TRIM25 chimera with ZAP N-terminus in place of SP     |
| pCR3.1 | ZAP/KHNYN fu   | ZAP X- KHNYN NYN                | Flag | --         | cut pCR3.1, gibson inserts in | fusion A- KHNYN NYN                                   |
| pCR3.1 | ZAP/KHNYN fu   | ZAP X- KHNYN NYN DDAA           | Flag | --         | cut pCR3.1, gibson inserts in | fusion A- KHNYN NYN                                   |

**Supplementary Table 2. Summary of crystallography**

| <b>Diffraction data</b>           | <b>ZAP<sub>X</sub>-KHNYN<sub>CTD</sub></b>            |
|-----------------------------------|-------------------------------------------------------|
| PDB ID                            | 9BGL                                                  |
| Space group                       | <i>P</i> 2 <sub>1</sub> 2 <sub>1</sub> 2 <sub>1</sub> |
| Unit cell (Å)                     | 36.214, 88.001, 94.547                                |
| Wavelength (Å)                    | 0.97875                                               |
| d <sub>min</sub> (Å)              | 2.30 (2.30-2.34) <sup>1</sup>                         |
| R <sub>sym</sub> <sup>2</sup> (%) | 6.5 (54.8)                                            |
| CC <sub>½</sub>                   | 1.00 (0.90)                                           |
| <I/σI>                            | 27.0 (3.7)                                            |
| Unique reflections                | 14,164                                                |
| Completeness (%)                  | 100 (100)                                             |
| Redundancy                        | 7.1 (7.2)                                             |
| <b>Refinement</b>                 |                                                       |
| Data range (Å)                    | 44-2.30                                               |
| # reflections                     | 13,430                                                |
| R <sub>work</sub> <sup>3</sup>    | 0.206                                                 |
| R <sub>free</sub> <sup>4</sup>    | 0.245                                                 |
| Amino acid residues               | 265                                                   |
| Protein atoms                     | 2075                                                  |
| Waters                            | 131                                                   |
| R.m.s.d. <sup>5</sup>             |                                                       |
| Bonds (Å)                         | 0.007                                                 |
| Angles (°)                        | 0.85                                                  |
| Ramachandran                      |                                                       |
| Favored (%)                       | 96.46                                                 |
| Allowed (%)                       | 3.54                                                  |
| Outliers (%)                      | 0                                                     |
| MolProbity clash score            | 2.16                                                  |

<sup>1</sup>Statistics for the outermost shell of data are in parentheses.

<sup>2</sup> $R_{\text{sym}} = \sum_h \sum_j |I_{hj} - \langle I_h \rangle| / \sum_h \sum_j I_{hj}$ , where  $I_{hj}$  is the intensity of observation  $j$  of reflection  $h$  and  $\langle I_h \rangle$  is the mean intensity for multiply recorded reflections.

<sup>3</sup> $R\text{-factor} = \sum_h | |F_o| - |F_c| | / \sum_h |F_o|$ , where  $F_o$  and  $F_c$  are the observed and calculated structure factor amplitudes for reflection  $h$ .

<sup>4</sup> $R_{\text{free}}$  was calculated for a random 5% of reflections that were excluded from refinement.

<sup>5</sup>Root mean square deviation of bond lengths and bond angles from target values.
